# Supplementary material for: Amyloid age and tau PET timeline to symptomatic Alzheimer’s disease in Down syndrome
Source: bioRxiv or medRxiv preprint supplement (doi:10.1101/2024.08.08.24311702), 2024-08-09

Supplementary Table 1.

*Regression models predicting cognitive skills and dementia symptoms at baseline/change in cognition and dementia symptoms with amyloid age.*

|                              | mCRT total score   |              |        | mCRT intrusions   |                               |        | DSMSE   |                |        | NTG-EDSD   |             |        |
|------------------------------|--------------------|--------------|--------|-------------------|-------------------------------|--------|---------|----------------|--------|------------|-------------|--------|
|                              | B                  | 95% CI       | p      | B                 | 95% CI                        | p      | B       | 95% CI         | p      | B          | 95% CI      | p      |
| Amyloid age                  | -0.49              | -0.60, -0.38 | < 0.01 | 0.41              | 0.32, 0.51                    | < 0.01 | -0.61   | -0.81, -0.41   | <0.01  | 0.38       | 0.26, 0.50  | < 0.01 |
| Amyloid age <sup>2</sup>     | -0.04              | -0.05, -0.03 | < 0.01 | 0.03              | 0.02, 0.04                    | < 0.01 | -0.03   | -0.05, -0.01   | <0.01  | 0.02       | 0.01, 0.03  | < 0.01 |
| Sex (female)                 | 1.01               | -0.61, 2.63  | 0.22   | -1.11             | -2.49, 0.28                   | 0.12   | 3.02    | 0.16, 5.89     | 0.04   | 0.20       | -1.51, 1.91 | 0.82   |
| Lifetime ID level (vs. Mild) |                    |              |        |                   |                               |        |         |                |        |            |             |        |
| Moderate                     | -1.32              | -3.11, 0.48  | 0.15   | -0.04             | -1.57, 1.50                   | 0.96   | -8.99   | -12.19, -5.80  | < 0.01 | 1.21       | -0.69, 3.12 | 0.22   |
| Severe/Profound              | -6.27              | -8.74, -3.79 | < 0.01 | 3.62              | 1.50, 5.75                    | < 0.01 | -23.76  | -28.08, -19.45 | < 0.01 | 1.22       | -1.36, 3.80 | 0.35   |
| APOE e4                      | 0.99               | -0.95, 2.94  | 0.32   | -0.10             | -1.77, 1.58                   | 0.91   | 0.11    | -3.33, 3.56    | 0.95   | -0.60      | -2.67, 1.47 | 0.57   |
|                              | Δ mCRT total score |              |        | Δ mCRT intrusions |                               |        | Δ DSMSE |                |        | Δ NTG-EDSD |             |        |
| Amyloid age                  | -0.41              | -0.60, -0.22 | < 0.01 | 0.29              | 0.02, 0.55                    | 0.03   | -0.47   | -0.77, -0.18   | < 0.01 | 0.25       | 0.02, 0.48  | 0.03   |
| Amyloid age <sup>2</sup>     | -0.03              | -0.05, -0.01 | < 0.01 | -0.01             | -0.03, 0.02                   | 0.51   | -0.04   | -0.07, -0.01   | 0.01   | 0.04       | 0.01, 0.06  | < 0.01 |
| Amyloid age <sup>3</sup>     |                    |              |        | -0.002            | -0.01, -3.25x10 <sup>-4</sup> | 0.02   |         |                |        |            |             |        |
| Sex (female)                 |                    |              |        | -0.42             | -2.52, 1.69                   | 0.70   |         |                |        |            |             |        |
| Lifetime ID level (vs. Mild) | 1.06               | -1.23, 3.34  | 0.36   |                   |                               |        | 1.22    | -2.38, 4.82    | 0.50   | -0.22      | -2.97, 2.53 | 0.88   |
| Moderate                     | -0.01              | -2.67, 2.66  | 0.99   | 0.17              | -2.27, 2.61                   | 0.89   | -0.61   | -4.80, 3.58    | 0.77   | 0.93       | -2.25, 4.12 | 0.56   |
| Severe/Profound              | 0.30               | -2.70, 3.30  | 0.84   | -0.18             | -2.92, 2.57                   | 0.90   | 1.19    | -3.53, 5.92    | 0.62   | -0.14      | -3.83, 3.55 | 0.94   |
| APOE e4                      | 1.21               | -1.45, 3.87  | 0.37   | -0.64             | -3.07, 1.78                   | 0.60   | 2.40    | -1.78, 6.58    | 0.26   | -0.91      | -4.10, 2.28 | 0.57   |

mCRT = Modified Cued Recall Test; DSMSE = Down Syndrome Mental Status Examination; NTG-EDSD = National Task Group-Early Detection Screen for Dementia; ID = Intellectual disability; APOE = Apolipoprotein E

Supplementary Table 2.

Regression models predicting tau PET SUVR in Braak NFT regions I-II, III-IV, V-VI with amyloid age.  $\Delta$  = change in Braak NFT

|                              | Braak NFT regions I-II |                                 |        | Braak NFT regions III-IV |                                   |       | Braak NFT regions V-VI |                                 |       |
|------------------------------|------------------------|---------------------------------|--------|--------------------------|-----------------------------------|-------|------------------------|---------------------------------|-------|
|                              | B                      | 95% CI                          | p      | B                        | 95% CI                            | p     | B                      | 95% CI                          | p     |
| Amyloid age                  | 0.02                   | 0.01, 0.02                      | < 0.01 | 0.01                     | 0.01, 0.02                        | <0.01 | <0.01                  | - <0.01, 0.01                   | 0.09  |
| Amyloid age <sup>2</sup>     | 0.01                   | <0.01, 0.01                     | <0.01  | <0.01                    | <0.01, <0.01                      | <0.01 | <0.01                  | <0.01, <0.01                    | <0.01 |
| Amyloid age <sup>3</sup>     |                        |                                 |        | <0.01                    | <0.01, <0.01                      | <0.01 | <0.01                  | <0.01, <0.01                    | <0.01 |
| Sex (female)                 | -0.01                  | -0.04, 0.04                     | 0.97   | -0.01                    | -0.04, 0.03                       | 0.78  | - 0.01                 | -0.04, 0.03                     | 0.78  |
| Lifetime ID level (vs. Mild) |                        |                                 |        |                          |                                   |       |                        |                                 |       |
| Moderate                     | 0.03                   | -0.02, 0.07                     | 0.21   | <0.01                    | -0.03, 0.04                       | 0.87  | -0.02                  | -0.06, 0.02                     | 0.29  |
| Severe/Profound              | -0.01                  | -0.07, 0.05                     | 0.69   | -0.01                    | -0.06, 0.04                       | 0.58  | - <0.01                | -0.06, 0.05                     | 0.94  |
| APOE e4                      | 0.02                   | -0.03, 0.07                     | 0.48   | -0.01                    | -0.05, 0.03                       | 0.79  | - <0.01                | -0.05, 0.04                     | 0.90  |
|                              |                        | $\Delta$ Braak NFT regions I-II |        |                          | $\Delta$ Braak NFT regions III-IV |       |                        | $\Delta$ Braak NFT regions V-VI |       |
| Amyloid age                  | 0.01                   | 0.01, 0.02                      | <0.01  | 0.01                     | 0.01, 0.02                        | <0.01 | 0.01                   | 0.01, 0.02                      | <0.01 |
| Amyloid age <sup>2</sup>     | <0.01                  | -<0.01, <0.01                   | 0.86   | <0.01                    | <0.01, <0.01                      | 0.01  | <0.01                  | <0.01, <0.01                    | 0.01  |
| Amyloid age <sup>3</sup>     | <0.01                  | -<0.01, -<0.01                  | <0.01  | -<0.01                   | -<0.01, -<0.01                    | 0.01  | -<0.01                 | -<0.01, -<0.01                  | 0.03  |
| Sex (female)                 | -0.01                  | -0.04, 0.03                     | 0.68   | -<0.01                   | -0.04, 0.03                       | 0.87  | -<0.01                 | -0.05, 0.04                     | 0.88  |
| Lifetime ID level (vs. Mild) |                        |                                 |        |                          |                                   |       |                        |                                 |       |
| Moderate                     | <0.01                  | -0.04, 0.04                     | 0.85   | 0.03                     | -0.02, 0.07                       | 0.27  | 0.02                   | -0.03, 0.07                     | 0.50  |
| Severe/Profound              | 0.01                   | -0.04, 0.05                     | 0.67   | <0.01                    | -0.05, 0.05                       | 0.95  | -0.01                  | -0.06, 0.05                     | 0.81  |
| APOE e4                      | 0.01                   | -0.03, 0.05                     | 0.75   | -0.01                    | -0.05, 0.04                       | 0.78  | -0.01                  | -0.06, 0.04                     | 0.68  |

ID = Intellectual disability; APOE = Apolipoprotein E

Supplementary Figure 1. ANOVA comparison between amyloid age categorized by clinical status (cognitively stable, MCI, AD, unable to determine). Amyloid age of 0 years indicates A $\beta$ + (18 CL).

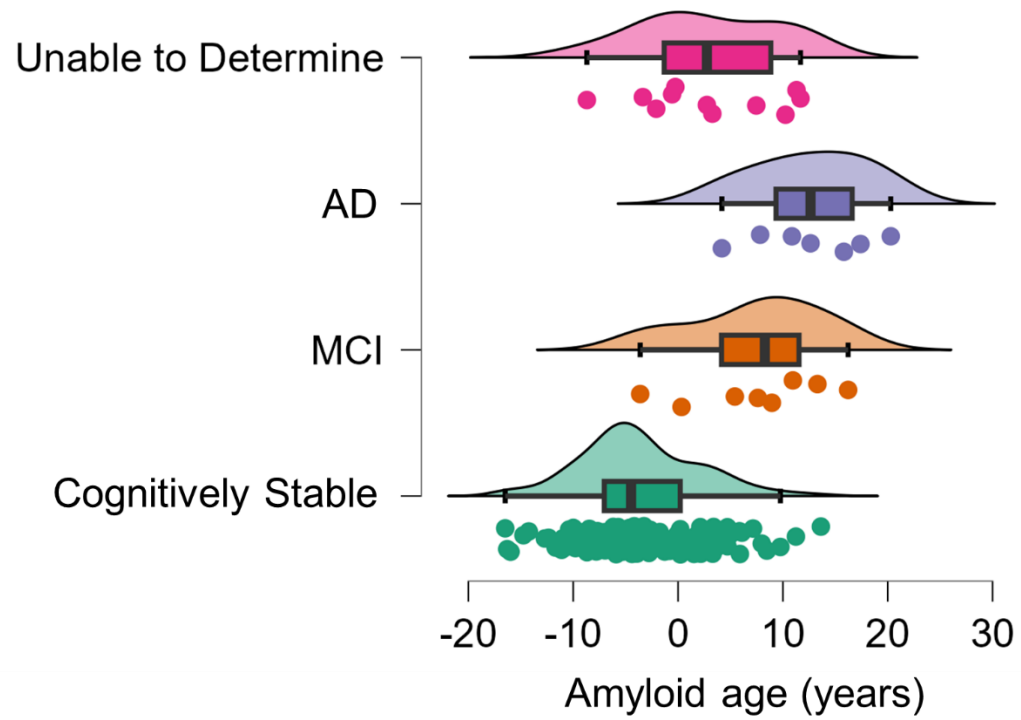

Supplementary Figure 2. ANOVA comparisons between tau Braak NFT SUVR (NFT I.II; NFT III.IV; NFT V.VI) categorized by clinical status (cognitively stable, MCI, AD, unable to determine).

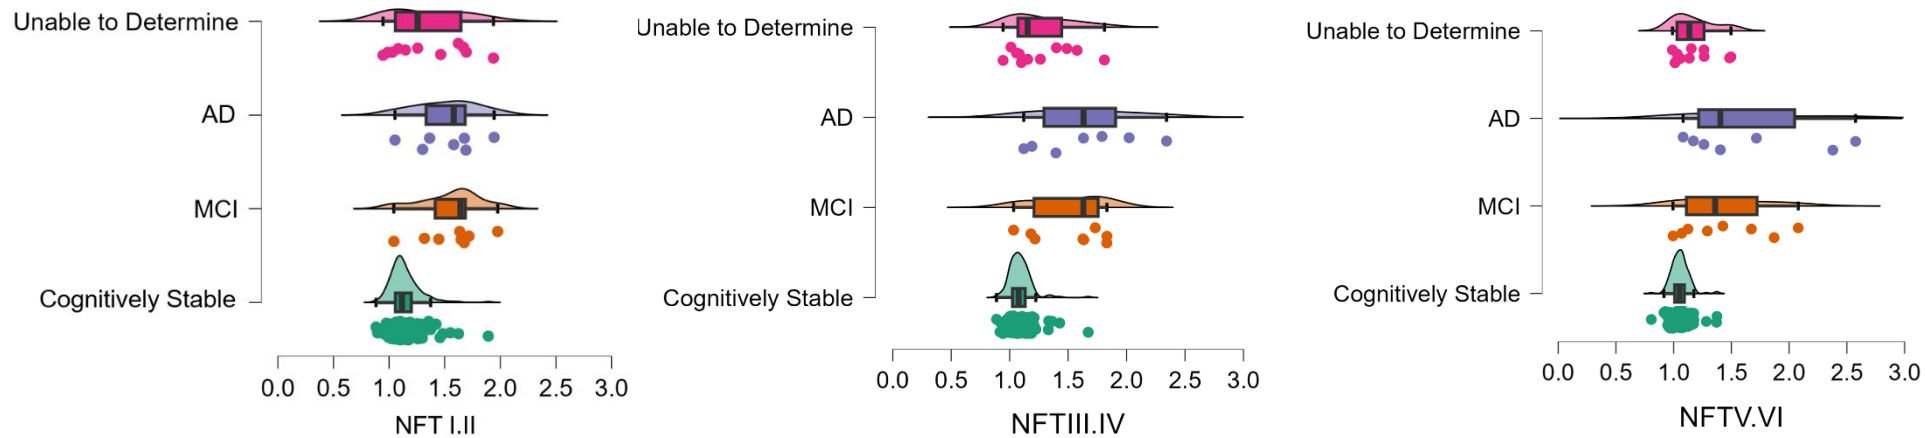

Supplement: Supplementary file [file media-1.pdf]
